# Supplementary material
Source: PubMed Central journal article supplement (PMC10597349)
Supplement: msphere.00278-23-s0005.pdf [file msphere.00278-23-s0005.pdf]

Table S3. Mass spectrometry: Enrichment over non-specific host background

| Column1 | Column2                                                                      | Column3          | Column4         | Column5     | Column6          | Column7             | Column8    |
|---------|------------------------------------------------------------------------------|------------------|-----------------|-------------|------------------|---------------------|------------|
| #       | Identified Proteins (247)                                                    | Accession Number | Molecular W (A) | Mock+αORF46 | (B) Infected+IgG | (C) Infected+αORF46 | C/A        |
| 11      | Thymidine kinase OS=Murid herpesvirus 4 OX=33708 GN=GAMM O41940              |                  | 72 kDa          | 2           | 255              | 217                 | 108.5      |
| 15      | DNA polymerase OS=Murid herpesvirus 4 OX=33708 GN=GAMM/ O41930               |                  | 116 kDa         | 3           | 72               | 246                 | 82         |
| 8       | Major capsid protein OS=Murid herpesvirus 4 OX=33708 GN=GAM O41943           |                  | 153 kDa         | 5           | 311              | 337                 | 67.4       |
| 49      | Unconventional myosin-Va OS=Mus musculus OX=10090 GN=My D3YZ62 (+2)          |                  | 212 kDa         | 0           | 74               | 66                  | 66         |
| 112     | Uracil-DNA glycosylase OS=Murid herpesvirus 4 OX=33708 GN=B P88984           |                  | 28 kDa          | 0           | 1                | 64                  | 64         |
| 53      | 75b OS=Murid herpesvirus 4 OX=33708 GN=GAMMAHV. ORF75b I041977               |                  | 142 kDa         | 0           | 75               | 61                  | 61         |
| 65      | 62 protein OS=Murid herpesvirus 4 OX=33708 GN=62 PE=4 SV=1 Q9QA12            |                  | 37 kDa          | 0           | 44               | 60                  | 60         |
| 63      | Envelope glycoprotein B OS=Murid herpesvirus 4 OX=33708 GN=C Q98336          |                  | 97 kDa          | 0           | 53               | 51                  | 51         |
| 77      | 65 protein OS=Murid herpesvirus 4 OX=33708 GN=GAMMAHV.M I041966              |                  | 20 kDa          | 1           | 36               | 49                  | 49         |
| 79      | Large tegument protein denedylase OS=Murid herpesvirus 4 OX= O41965          |                  | 274 kDa         | 0           | 40               | 49                  | 49         |
| 89      | Drebrin OS=Mus musculus OX=10090 GN=Dbn1 PE=1 SV=1 A0A0R4J1E3                |                  | 73 kDa          | 1           | 42               | 38                  | 38         |
| 36      | 59 protein OS=Murid herpesvirus 4 OX=33708 GN=BALF3 (provisi P88996          |                  | 42 kDa          | 3           | 52               | 108                 | 36         |
| 97      | Ribonucleoside-diphosphate reductase large subunit OS=Murid h O41962         |                  | 88 kDa          | 1           | 39               | 36                  | 36         |
| 48      | Unconventional myosin-Ib OS=Mus musculus OX=10090 GN=Myo P46735 (+1)         |                  | 129 kDa         | 2           | 69               | 66                  | 33         |
| 104     | Protein phosphatase 1 regulatory subunit 12A OS=Mus musculus Q9DBR7          |                  | 115 kDa         | 0           | 41               | 32                  | 32         |
| 138     | Capsid scaffolding protein OS=Murid herpesvirus 4 OX=33708 GN O41936         |                  | 59 kDa          | 1           | 23               | 31                  | 31         |
| 111     | Unconventional myosin-6 OS=Mus musculus OX=10090 GN=Myo E9PVU0 (+1)          |                  | 146 kDa         | 0           | 39               | 30                  | 30         |
| 134     | Phostensin OS=Mus musculus OX=10090 GN=Ppp1r18 PE=1 SV=1 Q8BQ30              |                  | 66 kDa          | 1           | 27               | 29                  | 29         |
| 146     | 4 protein OS=Murid herpesvirus 4 OX=33708 GN=GAMMAHV. ORF O41927             |                  | 42 kDa          | 0           | 23               | 26                  | 26         |
| 171     | Nuclear egress protein 1 OS=Murid herpesvirus 4 OX=33708 GN= O41970          |                  | 33 kDa          | 0           | 19               | 26                  | 26         |
| 69      | M3 OS=Murid herpesvirus 4 OX=33708 GN=GAMMAHV.M3 PE=1 O41925                 |                  | 44 kDa          | 2           | 45               | 50                  | 25         |
| 145     | Nexilin OS=Mus musculus OX=10090 GN=Nexn PE=1 SV=1 A0A0G2JFD8                |                  | 64 kDa          | 1           | 28               | 23                  | 23         |
| 152     | Leucine zipper protein 1 OS=Mus musculus OX=10090 GN=Luzp1 Q8R4U7            |                  | 119 kDa         | 0           | 27               | 23                  | 23         |
| 163     | Pericentriolar material 1 protein OS=Mus musculus OX=10090 G Q9R0L6          |                  | 229 kDa         | 0           | 28               | 22                  | 22         |
| 84      | Triplex capsid protein 2 OS=Murid herpesvirus 4 OX=33708 GN=B P88980         |                  | 33 kDa          | 2           | 38               | 43                  | 21.5       |
| 187     | 63 protein OS=Murid herpesvirus 4 OX=33708 GN=63 PE=4 SV=1 Q9QA11            |                  | 103 kDa         | 0           | 18               | 21                  | 21         |
| 203     | 11 protein OS=Murid herpesvirus 4 OX=33708 GN=GAMMAHV. OF O41932             |                  | 43 kDa          | 0           | 15               | 21                  | 21         |
| 164     | Capsid vertex component 2 OS=Murid herpesvirus 4 OX=33708 G O41938           |                  | 58 kDa          | 0           | 24               | 20                  | 20         |
| 170     | 23 protein OS=Murid herpesvirus 4 OX=33708 GN=GAMMAHV. OF O41941             |                  | 43 kDa          | 0           | 24               | 20                  | 20         |
| 177     | Tight junction protein ZO-2 OS=Mus musculus OX=10090 GN=Tjp A0A3B2WBH9 (+2)  |                  | 131 kDa         | 0           | 22               | 20                  | 20         |
| 83      | Protein flightless-1 homolog OS=Mus musculus OX=10090 GN=Fl Q9JJ28           |                  | 145 kDa         | 2           | 48               | 38                  | 19         |
| 202     | Supervillin OS=Mus musculus OX=10090 GN=Svil PE=1 SV=1 A0A1B0GS91            |                  | 253 kDa         | 0           | 15               | 19                  | 19         |
| 107     | Src substrate cactactin OS=Mus musculus OX=10090 GN=Cttn PE= Q60598          |                  | 61 kDa          | 2           | 29               | 35                  | 17.5       |
| 205     | Rac GTPase-activating protein 1 OS=Mus musculus OX=10090 G Q9WVM1            |                  | 70 kDa          | 1           | 18               | 17                  | 17         |
| 17      | 75c OS=Murid herpesvirus 4 OX=33708 GN=GAMMAHV. ORF75c F O41976              |                  | 146 kDa         | 7           | 159              | 118                 | 16.8571429 |
| 43      | LIM domain and actin-binding protein 1 OS=Mus musculus OX=1C Q9ER20          |                  | 84 kDa          | 4           | 82               | 66                  | 16.5       |
| 192     | Major DNA-binding protein OS=Murid herpesvirus 4 OX=33708 G O41928           |                  | 123 kDa         | 0           | 19               | 15                  | 15         |
| 184     | Myo18a protein OS=Mus musculus OX=10090 GN=Myo18a PE=1 !B2RRE2 (+3)          |                  | 232 kDa         | 0           | 25               | 14                  | 14         |
| 206     | Kinesin-like protein KIF23 OS=Mus musculus OX=10090 GN=Kif23 E9Q5G3          |                  | 109 kDa         | 0           | 19               | 14                  | 14         |
| 209     | Kelch-like ECH-associated protein 1 OS=Mus musculus OX=10090 A0A1L1S510      |                  | 69 kDa          | 0           | 17               | 14                  | 14         |
| 162     | Nucleolar and coiled-body phosphoprotein 1 (Fragment) OS=Mus A0A286YDV7 (+1) |                  | 74 kDa          | 2           | 22               | 24                  | 12         |
| 204     | Myosin phosphatase Rho-interacting protein OS=Mus musculus C P97434          |                  | 116 kDa         | 0           | 27               | 12                  | 12         |
| 208     | Epidermal growth factor receptor kinase substrate 8 OS=Mus mu Q08509         |                  | 92 kDa          | 0           | 17               | 12                  | 12         |
| 216     | Unconventional myosin-Id OS=Mus musculus OX=10090 GN=Myo Q5SYD0              |                  | 116 kDa         | 0           | 17               | 10                  | 10         |
| 234     | Unconventional myosin-le OS=Mus musculus OX=10090 GN=Myo E9Q634              |                  | 127 kDa         | 0           | 17               | 10                  | 10         |
| 68      | Tropomodulin-3 OS=Mus musculus OX=10090 GN=Tmod3 PE=1 S Q9JIH0               |                  | 40 kDa          | 5           | 49               | 49                  | 9.8        |
| 3       | Myosin-10 OS=Mus musculus OX=10090 GN=Myh10 PE=1 SV=1 Q3UH59 (+1)            |                  | 233 kDa         | 69          | 719              | 629                 | 9.11594203 |
| 27      | Unconventional myosin-Ic OS=Mus musculus OX=10090 GN=Myo Q9W7I7              |                  | 122 kDa         | 13          | 110              | 110                 | 8.46153846 |
| 24      | Myosin, light chain 12A, regulatory, non-sarcomeric OS=Mus mu Q6ZWQ9         |                  | 20 kDa          | 15          | 109              | 117                 | 7.8        |
| 1       | Myosin-9 OS=Mus musculus OX=10090 GN=Myh9 PE=1 SV=4 Q8VDD5                   |                  | 226 kDa         | 229         | 2117             | 1774                | 7.74672489 |
| 155     | Coronin-1C OS=Mus musculus OX=10090 GN=Coro1c PE=1 SV=2 Q9WUM4               |                  | 53 kDa          | 3           | 23               | 21                  | 7          |
| 2       | Actin, cytoplasmic 1 OS=Mus musculus OX=10090 GN=Actb PE=1 P60710            |                  | 42 kDa          | 159         | 1079             | 1093                | 6.87421384 |
| 74      | F-actin-capping protein subunit alpha OS=Mus musculus OX=100 Q5RKN9          |                  | 33 kDa          | 6           | 45               | 40                  | 6.66666667 |
| 226     | Structural maintenance of chromosomes protein 1A OS=Mus mu Q9CQ62            |                  | 143 kDa         | 1           | 17               | 6                   | 6          |
| 9       | Filamin-B OS=Mus musculus OX=10090 GN=Flnb PE=1 SV=3 Q80X90                  |                  | 278 kDa         | 38          | 255              | 221                 | 5.81578947 |
| 5       | Plectin OS=Mus musculus OX=10090 GN=Plec PE=1 SV=3 Q9QXS1                    |                  | 534 kDa         | 65          | 396              | 374                 | 5.75384615 |
| 70      | Lamina-associated polypeptide 2, isoforms alpha/zeta OS=Mus n Q61033         |                  | 75 kDa          | 8           | 45               | 42                  | 5.25       |
| 75      | F-actin-capping protein subunit alpha-2 OS=Mus musculus OX=1C P47754         |                  | 33 kDa          | 8           | 42               | 40                  | 5          |
| 191     | Actin-related protein 2 OS=Mus musculus OX=10090 GN=Actr2 PI P61161          |                  | 45 kDa          | 4           | 18               | 20                  | 5          |
| 31      | Tropomyosin beta chain OS=Bos taurus OX=9913 GN=TPM2 PE=2 Cont_ Q5KR48       |                  | 33 kDa          | 21          | 96               | 104                 | 4.95238095 |
| 16      | Tropomyosin alpha-1 chain OS=Mus musculus OX=10090 GN=Tpr Q8BSH3             |                  | 33 kDa          | 30          | 142              | 148                 | 4.93333333 |
| 56      | F-actin-capping protein subunit beta OS=Mus musculus OX=1009 A2AMW0          |                  | 29 kDa          | 11          | 57               | 54                  | 4.90909091 |
| 4       | Actin, aortic smooth muscle OS=Mus musculus OX=10090 GN=Ac P62737            |                  | 42 kDa          | 115         | 493              | 549                 | 4.77391304 |
| 34      | Tropomyosin 3, related sequence 7 OS=Mus musculus OX=10090 D3Z2H9            |                  | 29 kDa          | 23          | 82               | 105                 | 4.56521739 |
| 165     | Actin-related protein 2/3 complex subunit OS=Mus musculus OX- Q91Z25 (+1)    |                  | 41 kDa          | 4           | 25               | 17                  | 4.25       |
| 101     | Heterogeneous nuclear ribonucleoprotein M OS=Mus musculus O Q9D0E1           |                  | 78 kDa          | 9           | 33               | 36                  | 4          |
| 103     | Tight junction protein ZO-1 OS=Mus musculus OX=10090 GN=B9EHJ3               |                  | 189 kDa         | 7           | 38               | 28                  | 4          |
| 229     | Pleckstrin homology-like domain family B member 2 (Fragment) D3Z069          |                  | 127 kDa         | 0           | 19               | 4                   | 4          |
| 128     | Actin-related protein 2/3 complex subunit 2 OS=Mus musculus O Q9CVB6         |                  | 34 kDa          | 6           | 29               | 23                  | 3.83333333 |
| 87      | Actin-related protein 3 OS=Mus musculus OX=10090 GN=Actr3 PI Q99JY9          |                  | 47 kDa          | 10          | 38               | 37                  | 3.7        |
| 13      | Caldesmon 1 OS=Mus musculus OX=10090 GN=Cald1 PE=1 SV=1 Q8VCQ8               |                  | 60 kDa          | 59          | 164              | 202                 | 3.42372881 |
| 57      | Gelsolin OS=Mus musculus OX=10090 GN=Gsn PE=1 SV=3 P13020                    |                  | 86 kDa          | 15          | 52               | 51                  | 3.4        |
| 55      | Myosin light polypeptide 6 OS=Mus musculus OX=10090 GN=My I A0A1W2P6F6 (+2)  |                  | 17 kDa          | 16          | 53               | 53                  | 3.3125     |
| 67      | Probable ATP-dependent RNA helicase DDX5 OS=Mus musculus C Q61656 (+1)       |                  | 69 kDa          | 14          | 38               | 45                  | 3.21428571 |
| 130     | Nucleolar RNA helicase 2 OS=Mus musculus OX=10090 GN=Ddx2 Q9JJK5             |                  | 94 kDa          | 9           | 24               | 27                  | 3          |
| 225     | Dedicator of cytokinesis protein 7 OS=Mus musculus OX=10090 GA0A0U1RNK7 (+4) |                  | 238 kDa         | 2           | 16               | 6                   | 3          |
|         | <b>1 (=C/A) at least 3 times in infected compared to the mock</b>            |                  |                 |             |                  |                     |            |
| 44      | Tropomyosin alpha-4 chain OS=Mus musculus OX=10090 GN=Tpr Q6IRU2             |                  | 28 kDa          | 26          | 61               | 73                  | 2.80769231 |
| 6       | Filamin, alpha OS=Mus musculus OX=10090 GN=Flna PE=1 SV=1 B7FAU9 (+1)        |                  | 280 kDa         | 119         | 361              | 325                 | 2.73109244 |

|     |                                                                                |                 |         |     |     |     |            |
|-----|--------------------------------------------------------------------------------|-----------------|---------|-----|-----|-----|------------|
| 71  | Fascin OS=Mus musculus OX=10090 GN=Fscn1 PE=1 SV=4                             | Q61553          | 55 kDa  | 14  | 38  | 38  | 2.71428571 |
| 175 | AP-2 complex subunit mu OS=Mus musculus OX=10090 GN=Ap2r P84091 (+1)           |                 | 50 kDa  | 6   | 20  | 16  | 2.66666667 |
| 156 | Coatomer subunit beta' OS=Mus musculus OX=10090 GN=Copb2 O55029                |                 | 102 kDa | 8   | 21  | 19  | 2.375      |
| 95  | 60S ribosomal protein L4 OS=Mus musculus OX=10090 GN=Rpl4 Q9D8E6               |                 | 47 kDa  | 16  | 20  | 36  | 2.25       |
| 247 | Titin OS=Mus musculus OX=10090 GN=Ttn PE=1 SV=1                                | A2ASS6-DECOY    | ?       | 5   | 9   | 11  | 2.2        |
| 52  | Coatomer subunit alpha OS=Mus musculus OX=10090 GN=Copa F8WHHL2 (+1)           |                 | 139 kDa | 25  | 61  | 51  | 2.04       |
| 189 | CAD protein OS=Mus musculus OX=10090 GN=Cad PE=1 SV=1                          | B2RQC6 (+1)     | 243 kDa | 6   | 19  | 12  | 2          |
| 198 | ATP-dependent RNA helicase DDX1 OS=Mus musculus OX=10090 Q91VR5                |                 | 83 kDa  | 6   | 17  | 12  | 2          |
| 93  | ATP-dependent RNA helicase DDX3X OS=Mus musculus OX=1009 Q62167                |                 | 73 kDa  | 15  | 31  | 29  | 1.93333333 |
| 147 | Helix-destabilizing protein OS=Mus musculus OX=10090 GN=Hnrr Q5EBP8            |                 | 39 kDa  | 12  | 14  | 23  | 1.91666667 |
| 157 | Serine/threonine-protein phosphatase PP1-alpha catalytic subunit P62137        |                 | 38 kDa  | 10  | 17  | 19  | 1.9        |
| 26  | Alpha-actinin-4 OS=Mus musculus OX=10090 GN=Actn4 PE=1 SV:P57780               |                 | 105 kDa | 49  | 104 | 90  | 1.83673469 |
| 114 | 60S ribosomal protein L6 OS=Mus musculus OX=10090 GN=Rpl6 P47911               |                 | 34 kDa  | 14  | 22  | 25  | 1.78571429 |
| 22  | Spectrin alpha chain, non-erythrocytic 1 OS=Mus musculus OX=10090 Q1P6546      |                 | 285 kDa | 51  | 128 | 91  | 1.78431373 |
| 33  | Spectrin beta chain, non-erythrocytic 1 OS=Mus musculus OX=10090 Q62261        |                 | 274 kDa | 40  | 102 | 71  | 1.775      |
| 127 | E3 ubiquitin-protein ligase NEDD4 OS=Mus musculus OX=10090 P46935              |                 | 103 kDa | 13  | 22  | 23  | 1.76923077 |
| 90  | 40S ribosomal protein S3a OS=Mus musculus OX=10090 GN=Rps P97351               |                 | 30 kDa  | 21  | 28  | 36  | 1.71428571 |
| 196 | Growth factor receptor-bound protein 10 OS=Mus musculus OX=10090 Q60760        |                 | 71 kDa  | 7   | 17  | 12  | 1.71428571 |
| 38  | Basement membrane-specific heparan sulfate proteoglycan core E9PZ16            |                 | 470 kDa | 33  | 76  | 56  | 1.6969697  |
| 37  | Alpha actinin 1a OS=Mus musculus OX=10090 GN=Actn1 PE=1 SV:A1BN54 (+1)         |                 | 103 kDa | 41  | 63  | 66  | 1.6097561  |
| 72  | Polyadenylate-binding protein 1 OS=Mus musculus OX=10090 GNP29341              |                 | 71 kDa  | 20  | 41  | 32  | 1.6        |
| 185 | RNA-splicing ligase RtcB homolog OS=Mus musculus OX=10090 Q99LF4               |                 | 55 kDa  | 7   | 18  | 11  | 1.57142857 |
| 115 | 60S ribosomal protein L3 OS=Mus musculus OX=10090 GN=Rpl3 P27659               |                 | 46 kDa  | 17  | 20  | 26  | 1.52941176 |
| 124 | Heterogeneous nuclear ribonucleoprotein F OS=Mus musculus OX=10090 Q9Z2X1      |                 | 46 kDa  | 14  | 26  | 21  | 1.5        |
| 122 | 60S ribosomal protein L7 OS=Mus musculus OX=10090 GN=Rpl7 P14148               |                 | 31 kDa  | 20  | 17  | 27  | 1.35       |
| 12  | Fibronectin OS=Mus musculus OX=10090 GN=Fn1 PE=1 SV=1                          | A0A087WR50 (+1) | 263 kDa | 114 | 172 | 152 | 1.33333333 |
| 136 | 40S ribosomal protein S2 OS=Mus musculus OX=10090 GN=Rps2 P25444               |                 | 31 kDa  | 15  | 18  | 20  | 1.33333333 |
| 92  | Collagen alpha-1(I) chain OS=Mus musculus OX=10090 GN=Col1a P11087             |                 | 138 kDa | 19  | 32  | 25  | 1.31578947 |
| 129 | Y-box-binding protein 1 OS=Mus musculus OX=10090 GN=Ybx1 P162960               |                 | 36 kDa  | 17  | 20  | 21  | 1.23529412 |
| 25  | Heat shock protein HSP 90-beta OS=Mus musculus OX=10090 GN P11499              |                 | 83 kDa  | 67  | 100 | 78  | 1.1641791  |
| 81  | 40S ribosomal protein S4, X isoform OS=Mus musculus OX=10090 P62702            |                 | 30 kDa  | 25  | 26  | 29  | 1.16       |
| 105 | Eukaryotic initiation factor 4A-I OS=Mus musculus OX=10090 GN:P60843           |                 | 46 kDa  | 20  | 25  | 23  | 1.15       |
| 30  | Tubulin beta-5 chain OS=Mus musculus OX=10090 GN=Tubb5 PE:P99024               |                 | 50 kDa  | 65  | 86  | 71  | 1.09230769 |
| 60  | Myb-binding protein 1A OS=Mus musculus OX=10090 GN=Mybbp Q7TPV4                |                 | 152 kDa | 33  | 44  | 36  | 1.09090909 |
| 99  | RNA helicase OS=Mus musculus OX=10090 GN=Ddx17 PE=1 SV=1 Q3U741                |                 | 73 kDa  | 23  | 25  | 25  | 1.08695652 |
| 88  | Elongation factor 1-gamma OS=Mus musculus OX=10090 GN=Eef Q9D8N0               |                 | 50 kDa  | 25  | 27  | 27  | 1.08       |
| 39  | Tubulin alpha-1B chain OS=Mus musculus OX=10090 GN=Tuba1b P05213               |                 | 50 kDa  | 53  | 59  | 56  | 1.05660377 |
| 32  | Filamin-C OS=Mus musculus OX=10090 GN=Flnc PE=1 SV=3                           | Q8VHX6          | 291 kDa | 73  | 68  | 75  | 1.02739726 |
| 94  | 60S acidic ribosomal protein P0 OS=Mus musculus OX=10090 GN P14869             |                 | 34 kDa  | 25  | 25  | 25  | 1          |
| 35  | Heat shock protein HSP 90-alpha OS=Mus musculus OX=10090 P07901                |                 | 85 kDa  | 59  | 68  | 58  | 0.98305085 |
| 86  | Ras GTPase-activating-like protein IQGAP1 OS=Mus musculus OX Q9JKF1            |                 | 189 kDa | 30  | 28  | 29  | 0.96666667 |
| 173 | Phosphate carrier protein, mitochondrial OS=Mus musculus OX=10090 Q8VEM8       |                 | 40 kDa  | 19  | 9   | 18  | 0.94736842 |
| 149 | Importin subunit beta-1 OS=Mus musculus OX=10090 GN=Kpnb1 P70168               |                 | 97 kDa  | 18  | 15  | 17  | 0.94444444 |
| 40  | Elongation factor 2 OS=Mus musculus OX=10090 GN=Eef2 PE=1 SV:P58252            |                 | 95 kDa  | 62  | 42  | 57  | 0.91935484 |
| 116 | 14-3-3 protein zeta/delta OS=Mus musculus OX=10090 GN=Ywhz P63101              |                 | 28 kDa  | 24  | 17  | 22  | 0.91666667 |
| 58  | Nucleolin OS=Mus musculus OX=10090 GN=Ncl PE=1 SV=2                            | P09405          | 77 kDa  | 45  | 31  | 41  | 0.91111111 |
| 41  | Vimentin OS=Mus musculus OX=10090 GN=Vim PE=1 SV=3                             | P20152          | 54 kDa  | 56  | 53  | 49  | 0.875      |
| 160 | Peptidyl-prolyl cis-trans isomerase A OS=Mus musculus OX=10090 P17742          |                 | 18 kDa  | 20  | 13  | 17  | 0.85       |
| 133 | Heterogeneous nuclear ribonucleoprotein U OS=Mus musculus OX Q8VEK3            |                 | 88 kDa  | 22  | 20  | 18  | 0.81818182 |
| 108 | ADP/ATP translocase 1 OS=Mus musculus OX=10090 GN=Slc25a4 P48962               |                 | 33 kDa  | 27  | 18  | 22  | 0.81481481 |
| 82  | 40S ribosomal protein S3 OS=Mus musculus OX=10090 GN=Rps3 P62908               |                 | 27 kDa  | 34  | 20  | 27  | 0.79411765 |
| 178 | Eukaryotic translation initiation factor 4 gamma 1 OS=Mus musculus E9PVC5 (+3) |                 | 175 kDa | 14  | 19  | 11  | 0.78571429 |
| 29  | Heat shock cognate 71 kDa protein OS=Mus musculus OX=10090 P63017              |                 | 71 kDa  | 85  | 70  | 66  | 0.77647059 |
| 137 | T-complex protein 1 subunit theta OS=Mus musculus OX=10090 P42932              |                 | 60 kDa  | 25  | 15  | 19  | 0.76       |
| 50  | Elongation factor 1-alpha 1 OS=Mus musculus OX=10090 GN=Eef P10126             |                 | 50 kDa  | 51  | 45  | 38  | 0.74509804 |
| 98  | T-complex protein 1 subunit beta OS=Mus musculus OX=10090 G P80314             |                 | 57 kDa  | 31  | 23  | 22  | 0.70967742 |
| 106 | Heterogeneous nuclear ribonucleoprotein K OS=Mus musculus OX B2M1R6 (+1)       |                 | 49 kDa  | 29  | 18  | 20  | 0.68965517 |
| 80  | Fatty acid synthase OS=Mus musculus OX=10090 GN=Fasn PE=1 P19096               |                 | 272 kDa | 31  | 25  | 21  | 0.67741935 |
| 100 | Prelamin-A/C OS=Mus musculus OX=10090 GN=Lmna PE=1 SV=2 P48678                 |                 | 74 kDa  | 35  | 29  | 23  | 0.65714286 |
| 179 | Proliferation-associated protein 2G4 OS=Mus musculus OX=10090 P50580           |                 | 44 kDa  | 19  | 11  | 12  | 0.63157895 |
| 154 | Annexin A5 OS=Mus musculus OX=10090 GN=Anxa5 PE=1 SV=1                         | P48036          | 36 kDa  | 21  | 13  | 13  | 0.61904762 |
| 168 | Arginine--tRNA ligase, cytoplasmic OS=Mus musculus OX=10090 Q9D0I9             |                 | 76 kDa  | 23  | 9   | 14  | 0.60869565 |
| 150 | Eukaryotic translation initiation factor 2 subunit 3, X-linked OS=M Q9Z0N1     |                 | 51 kDa  | 22  | 12  | 13  | 0.59090909 |
| 158 | T-complex protein 1 subunit gamma OS=Mus musculus OX=10090 P80318 (+1)         |                 | 61 kDa  | 22  | 14  | 13  | 0.59090909 |
| 110 | Annexin A1 OS=Mus musculus OX=10090 GN=Anxa1 PE=1 SV=2                         | P10107          | 39 kDa  | 34  | 14  | 20  | 0.58823529 |
| 61  | Pyruvate kinase PKM OS=Mus musculus OX=10090 GN=Pkm PE=1 P52480                |                 | 58 kDa  | 53  | 27  | 31  | 0.58490566 |
| 64  | Alpha-enolase OS=Mus musculus OX=10090 GN=Eno1 PE=1 SV=3 P17182                |                 | 47 kDa  | 53  | 23  | 31  | 0.58490566 |
| 66  | Annexin A2 OS=Mus musculus OX=10090 GN=Anxa2 PE=1 SV=2                         | P07356          | 39 kDa  | 47  | 22  | 27  | 0.57446809 |
| 167 | 40S ribosomal protein SA OS=Mus musculus OX=10090 GN=Rpsa P14206               |                 | 33 kDa  | 21  | 9   | 12  | 0.57142857 |
| 117 | ATP synthase subunit alpha, mitochondrial OS=Mus musculus OX Q03265            |                 | 60 kDa  | 32  | 12  | 18  | 0.5625     |
| 142 | Peroxisomal protein OS=Mus musculus OX=10090 GN=Prdx1 PE=1 SV:P35700           |                 | 22 kDa  | 25  | 13  | 14  | 0.56       |
| 109 | Transitional endoplasmic reticulum ATPase OS=Mus musculus OX Q01853            |                 | 89 kDa  | 33  | 18  | 18  | 0.54545455 |
| 132 | T-complex protein 1 subunit alpha OS=Mus musculus OX=10090 P11983              |                 | 60 kDa  | 27  | 15  | 14  | 0.51851852 |
| 143 | Receptor of activated protein C kinase 1 OS=Mus musculus OX=10090 P168040      |                 | 35 kDa  | 26  | 13  | 13  | 0.5        |
| 153 | L-lactate dehydrogenase A chain OS=Mus musculus OX=10090 G1 P06151             |                 | 36 kDa  | 26  | 6   | 13  | 0.5        |
| 174 | T-complex protein 1 subunit delta OS=Mus musculus OX=10090 P80315              |                 | 58 kDa  | 24  | 7   | 12  | 0.5        |
| 210 | Bifunctional purine biosynthesis protein ATIC OS=Mus musculus Q9CWX9           |                 | 64 kDa  | 16  | 4   | 8   | 0.5        |
| 139 | Phosphoglycerate kinase 1 OS=Mus musculus OX=10090 GN=Pgk P09411               |                 | 45 kDa  | 31  | 9   | 15  | 0.48387097 |
| 113 | 40S ribosomal protein S18 OS=Mus musculus OX=10090 GN=Rps A0A1Y7VKY1 (+1)      |                 | 18 kDa  | 29  | 16  | 14  | 0.48275862 |
| 140 | Moesin OS=Mus musculus OX=10090 GN=Msn PE=1 SV=3                               | P26041          | 68 kDa  | 29  | 14  | 14  | 0.48275862 |
| 59  | Clastrin heavy chain 1 OS=Mus musculus OX=10090 GN=Cltc PE=1 Q68FD5            |                 | 192 kDa | 56  | 33  | 27  | 0.48214286 |
| 180 | Heat shock 70 kDa protein 4 OS=Mus musculus OX=10090 GN=Hs Q3U2G2              |                 | 94 kDa  | 24  | 8   | 11  | 0.45833333 |

|     |                                                                                                 |          |     |    |    |            |
|-----|-------------------------------------------------------------------------------------------------|----------|-----|----|----|------------|
| 78  | Glyceraldehyde-3-phosphate dehydrogenase OS=Mus musculus CA0A0A0MQF6 (+1)                       | 39 kDa   | 47  | 20 | 21 | 0.44680851 |
| 197 | Phosphoserine aminotransferase OS=Mus musculus OX=10090 G Q99K85                                | 40 kDa   | 18  | 6  | 8  | 0.44444444 |
| 151 | Valine--tRNA ligase OS=Mus musculus OX=10090 GN=Vars1 PE= Q9Z1Q9                                | 140 kDa  | 26  | 11 | 11 | 0.42307692 |
| 118 | D-3-phosphoglycerate dehydrogenase OS=Mus musculus OX=100 G61753                                | 57 kDa   | 31  | 19 | 13 | 0.41935484 |
| 126 | Cytoplasmic dynein 1 heavy chain 1 OS=Mus musculus OX=10090 Q9JHU4                              | 532 kDa  | 31  | 22 | 13 | 0.41935484 |
| 96  | Talin-1 OS=Mus musculus OX=10090 GN=Tln1 PE=1 SV=2 P26039                                       | 270 kDa  | 37  | 23 | 15 | 0.40540541 |
| 181 | Alanine--tRNA ligase, cytoplasmic OS=Mus musculus OX=10090 ( Q8BQG7                             | 107 kDa  | 24  | 9  | 9  | 0.375      |
| 18  | Keratin, type I cytoskeletal 10 OS=Homo sapiens OX=9606 GN=KR Cont_ P13645                      | 59 kDa   | 159 | 65 | 59 | 0.37106918 |
| 123 | Serine hydroxymethyltransferase, mitochondrial OS=Mus musculus Q9CZN7                           | 56 kDa   | 38  | 6  | 14 | 0.36842105 |
| 219 | C-1-tetrahydrofolate synthase, cytoplasmic OS=Mus musculus OX Q922D8                            | 101 kDa  | 20  | 1  | 7  | 0.35       |
| 159 | Malate dehydrogenase, mitochondrial OS=Mus musculus OX=100 P08249                               | 36 kDa   | 32  | 1  | 11 | 0.34375    |
| 14  | AHNAK nucleoprotein (desmoyokin) OS=Mus musculus OX=10090 E9Q616                                | 604 kDa  | 190 | 83 | 65 | 0.34210526 |
| 73  | Protein disulfide-isomerase A3 OS=Mus musculus OX=10090 GN: P27773                              | 57 kDa   | 51  | 17 | 17 | 0.33333333 |
| 201 | T-complex protein 1 subunit eta OS=Mus musculus OX=10090 GN P80313                              | 60 kDa   | 19  | 11 | 6  | 0.31578947 |
| 194 | 26S proteasome non-ATPase regulatory subunit 2 OS=Mus musculus Q8VDM4                           | 100 kDa  | 17  | 13 | 5  | 0.29411765 |
| 28  | Endoplasmic reticulum chaperone BiP OS=Mus musculus OX=100 P20029                               | 72 kDa   | 141 | 38 | 39 | 0.27659574 |
| 62  | Endoplasmic reticulum chaperone BiP OS=Mus musculus OX=10090 GN=Hsp90b1 PE=1 SV P08113          | 92 kDa   | 68  | 21 | 17 | 0.25       |
| 176 | Ribosome-binding protein 1 OS=Mus musculus OX=10090 GN=Rr A2AVJ7 (+1)                           | 158 kDa  | 24  | 14 | 6  | 0.25       |
| 246 | E3 ubiquitin-protein ligase RNF213 OS=Mus musculus OX=10090 A0A171EBL2                          | 585 kDa  | 12  | 1  | 3  | 0.25       |
| 186 | Vinculin OS=Mus musculus OX=10090 GN=Vcl PE=1 SV=4 Q64727                                       | 117 kDa  | 29  | 6  | 7  | 0.24137931 |
| 42  | Green fluorescent protein OS=Aequorea victoria OX=6100 GN=GF Cont_ P42212                       | 27 kDa   | 129 | 0  | 31 | 0.24031008 |
| 190 | Ubiquitin-like modifier-activating enzyme 1 OS=Mus musculus O: Q02053                           | 118 kDa  | 25  | 9  | 6  | 0.24       |
| 10  | Keratin, type II cytoskeletal 1 OS=Homo sapiens OX=9606 GN=KR Cont_ P04264                      | 66 kDa   | 317 | 81 | 76 | 0.23974763 |
| 76  | 60 kDa heat shock protein, mitochondrial OS=Mus musculus OX=: P63038                            | 61 kDa   | 59  | 15 | 14 | 0.23728814 |
| 19  | Keratin, type I cytoskeletal 9 OS=Homo sapiens OX=9606 GN=KR1 Cont_ P35527                      | 62 kDa   | 201 | 37 | 47 | 0.23383085 |
| 169 | Transketolase OS=Mus musculus OX=10090 GN=Tkt PE=1 SV=1 P40142                                  | 68 kDa   | 30  | 7  | 7  | 0.23333333 |
| 121 | Caveolae-associated protein 1 OS=Mus musculus OX=10090 GN=O54724                                | 44 kDa   | 39  | 14 | 9  | 0.23076923 |
| 200 | Stress-induced-phosphoprotein 1 OS=Mus musculus OX=10090 G Q60864                               | 63 kDa   | 26  | 6  | 6  | 0.23076923 |
| 241 | Prolow-density lipoprotein receptor-related protein 1 OS=Mus musculus A0A0R4J0I9 (+1)           | 505 kDa  | 13  | 5  | 3  | 0.23076923 |
| 224 | Lysine--tRNA ligase OS=Mus musculus OX=10090 GN=Kars1 PE=1 Q99MNI1                              | 68 kDa   | 18  | 5  | 4  | 0.22222222 |
| 131 | ATP synthase subunit beta, mitochondrial OS=Mus musculus OX= P56480                             | 56 kDa   | 42  | 10 | 9  | 0.21428571 |
| 217 | Eukaryotic translation initiation factor 3 subunit L OS=Mus musculus Q8QZY1                     | 67 kDa   | 19  | 4  | 4  | 0.21052632 |
| 119 | Cytoskeleton-associated protein 4 OS=Mus musculus OX=10090 Q8B8MK4                              | 64 kDa   | 43  | 11 | 9  | 0.20930233 |
| 21  | Keratin, type II cytoskeletal 2 epidermal OS=Homo sapiens OX=9606 GN=KR2 Cont_ P35908           | 65 kDa   | 191 | 38 | 39 | 0.20418848 |
| 148 | Annexin OS=Mus musculus OX=10090 GN=Anxa6 PE=1 SV=1 F8WIT2                                      | 75 kDa   | 35  | 5  | 7  | 0.2        |
| 218 | Protein RCC2 OS=Mus musculus OX=10090 GN=Rcc2 PE=1 SV=1 Q8BK67                                  | 56 kDa   | 20  | 3  | 4  | 0.2        |
| 161 | Dolichyl-diphosphooligosaccharide--protein glycosyltransferase si Q91YQ5                        | 69 kDa   | 32  | 6  | 6  | 0.1875     |
| 125 | Calreticulin OS=Mus musculus OX=10090 GN=Calr PE=1 SV=1 P14211                                  | 48 kDa   | 51  | 5  | 9  | 0.17647059 |
| 102 | Serpin H1 OS=Mus musculus OX=10090 GN=Serpinh1 PE=1 SV=3 P19324                                 | 47 kDa   | 54  | 8  | 9  | 0.16666667 |
| 20  | Albumin OS=Bos taurus OX=9913 GN=ALB PE=1 SV=4 Cont_ P02769                                     | 69 kDa   | 197 | 39 | 32 | 0.16243655 |
| 45  | Keratin, type I cytoskeletal 14 OS=Homo sapiens OX=9606 GN=KR Cont_ P02533                      | 52 kDa   | 111 | 21 | 18 | 0.16216216 |
| 7   | Ig gamma-1 chain C region secreted form (Fragment) OS=Mus musculus A0A075B5P4                   | 36 kDa   | 621 | 72 | 99 | 0.15942029 |
| 230 | Far upstream element-binding protein 2 OS=Mus musculus OX=10090 GN=FAU3B2WCD8 (+1)              | 74 kDa   | 19  | 0  | 3  | 0.15789474 |
| 144 | Bifunctional glutamate/proline--tRNA ligase OS=Mus musculus C Q8CGC7                            | 170 kDa  | 46  | 6  | 7  | 0.15217391 |
| 141 | Keratin, type II cytoskeletal 4 OS=Homo sapiens OX=9606 GN=KR Cont_ P19013                      | 56 kDa   | 40  | 6  | 6  | 0.15       |
| 47  | Stress-70 protein, mitochondrial OS=Mus musculus OX=10090 G P38647                              | 73 kDa   | 109 | 18 | 16 | 0.14678899 |
| 212 | Asparagine--tRNA ligase OS=Mus musculus OX=10090 GN=Nars A0A498WVGK2 (+1)                       | 64 kDa   | 21  | 5  | 3  | 0.14285714 |
| 51  | Keratin, type II cytoskeletal 6A OS=Homo sapiens OX=9606 GN=K Cont_ P02538                      | 60 kDa   | 106 | 10 | 15 | 0.14150943 |
| 214 | Staphylococcal nuclease domain-containing protein 1 OS=Mus musculus Q78PY7                      | 102 kDa  | 22  | 4  | 3  | 0.13636364 |
| 54  | Keratin, type I cytoskeletal 16 OS=Homo sapiens OX=9606 GN=KR Cont_ P08779                      | 51 kDa   | 96  | 16 | 13 | 0.13541667 |
| 244 | Titin OS=Mus musculus OX=10090 GN=Ttn PE=1 SV=1 A0A5K1VVQ9                                      | 3925 kDa | 16  | 12 | 2  | 0.125      |
| 207 | Aspartate aminotransferase, mitochondrial OS=Mus musculus O: P05202                             | 47 kDa   | 25  | 1  | 3  | 0.12       |
| 215 | Aspartate--tRNA ligase, cytoplasmic OS=Mus musculus OX=1009 Q922B2                              | 57 kDa   | 25  | 2  | 3  | 0.12       |
| 183 | Calnexin OS=Mus musculus OX=10090 GN=Canx PE=1 SV=1 P35564                                      | 67 kDa   | 34  | 2  | 4  | 0.11764706 |
| 46  | Keratin, type II cytoskeletal 5 OS=Homo sapiens OX=9606 GN=KR Cont_ P13647                      | 62 kDa   | 121 | 14 | 14 | 0.11570248 |
| 238 | Eukaryotic translation initiation factor 3 subunit A OS=Mus musculus P23116                     | 162 kDa  | 19  | 3  | 2  | 0.10526316 |
| 220 | Sodium/potassium--transporting ATPase subunit alpha-1 OS=Mus musculus Q8VDN2                    | 113 kDa  | 20  | 3  | 2  | 0.1        |
| 120 | Protein disulfide-isomerase OS=Mus musculus OX=10090 GN=P4 P09103                               | 57 kDa   | 46  | 11 | 4  | 0.08695652 |
| 221 | Annexin A3 OS=Mus musculus OX=10090 GN=Anxa3 PE=1 SV=4 Q35639                                   | 36 kDa   | 23  | 2  | 2  | 0.08695652 |
| 242 | Lactotransferrin OS=Homo sapiens OX=9606 GN=LTF PE=1 SV=6 Cont_ P02788 (+1)                     | 78 kDa   | 15  | 0  | 1  | 0.06666667 |
| 236 | MICOS complex subunit Mic60 OS=Mus musculus OX=10090 GN=Q8CAQ8                                  | 84 kDa   | 20  | 0  | 1  | 0.05       |
| 166 | Protein disulfide-isomerase A4 OS=Mus musculus OX=10090 GN: A0A0R4J0Z1 (+1)                     | 72 kDa   | 43  | 0  | 2  | 0.04651163 |
| 135 | Desmoplakin OS=Mus musculus OX=10090 GN=Dsp PE=1 SV=1 E9Q557                                    | 333 kDa  | 55  | 0  | 2  | 0.03636364 |
| 193 | Neutral alpha-glucosidase AB OS=Mus musculus OX=10090 GN=: Q8BHN3                               | 107 kDa  | 34  | 0  | 1  | 0.02941176 |
| 23  | Plasminogen OS=Bos taurus OX=9913 GN=PLG PE=1 SV=2 Cont_ P06868                                 | 91 kDa   | 241 | 7  | 7  | 0.02904564 |
| 182 | Fibulin-2 OS=Mus musculus OX=10090 GN=Fbln2 PE=1 SV=2 P37889                                    | 132 kDa  | 36  | 1  | 1  | 0.02777778 |
| 85  | Keratin, type I cytoskeletal 13 OS=Homo sapiens OX=9606 GN=KR Cont_ P13646                      | 50 kDa   | 62  | 0  | 0  | 0          |
| 91  | Keratin, type I cytoskeletal 17 OS=Homo sapiens OX=9606 GN=KR Cont_ Q04695                      | 48 kDa   | 62  | 0  | 0  | 0          |
| 172 | Albumin OS=Homo sapiens OX=9606 GN=ALB PE=1 SV=2 Cont_ P02768                                   | 69 kDa   | 36  | 0  | 0  | 0          |
| 188 | Phosphoenolpyruvate carboxykinase (GTP) OS=Mus musculus OX: A0A0R4J0G0 (+1)                     | 73 kDa   | 40  | 0  | 0  | 0          |
| 195 | Junction plakoglobin OS=Mus musculus OX=10090 GN=Jup PE=1 Q02257                                | 82 kDa   | 34  | 0  | 0  | 0          |
| 199 | Mitochondrial 10-formyltetrahydrofolate dehydrogenase OS=Mus musculus Q8K009                    | 102 kDa  | 34  | 1  | 0  | 0          |
| 211 | Isocitrate dehydrogenase [NADP], mitochondrial OS=Mus musculus P54071                           | 51 kDa   | 29  | 0  | 0  | 0          |
| 213 | Cullin-associated NEDD8-dissociated protein 1 OS=Mus musculus Q6ZQ38                            | 136 kDa  | 27  | 4  | 0  | 0          |
| 222 | Succinate dehydrogenase [ubiquinone] flavoprotein subunit, mitochondrial OS=Mus musculus Q8K2B3 | 73 kDa   | 23  | 1  | 0  | 0          |
| 223 | Delta-1-pyrroline-5-carboxylate synthase OS=Mus musculus OX=1 Q9Z110                            | 87 kDa   | 24  | 0  | 0  | 0          |
| 227 | Keratin, type II cytoskeletal 78 OS=Homo sapiens OX=9606 GN=KI Cont_ Q8N1N4                     | 57 kDa   | 24  | 0  | 0  | 0          |
| 228 | Collagen, type VI, alpha 3 OS=Mus musculus OX=10090 GN=Col6: P9PWQ3                             | 354 kDa  | 24  | 0  | 0  | 0          |
| 231 | Lon protease homolog, mitochondrial OS=Mus musculus OX=100 Q8CGK3                               | 106 kDa  | 21  | 1  | 0  | 0          |
| 232 | Transcription intermediary factor 1-beta OS=Mus musculus OX=1 Q62318                            | 89 kDa   | 22  | 0  | 0  | 0          |
| 233 | Aconitate hydratase, mitochondrial OS=Mus musculus OX=10090 Q99KI0                              | 85 kDa   | 22  | 0  | 0  | 0          |
| 235 | Aldehyde dehydrogenase, mitochondrial OS=Mus musculus OX=1 A0A0G2JEU1 (+1)                      | 51 kDa   | 20  | 0  | 0  | 0          |

|     |                                                                        |         |    |   |   |   |
|-----|------------------------------------------------------------------------|---------|----|---|---|---|
| 237 | Monofunctional C1-tetrahydrofolate synthase, mitochondrial OS= Q3V3R1  | 106 kDa | 19 | 0 | 0 | 0 |
| 239 | Myoferlin OS=Mus musculus OX=10090 GN=Myof PE=1 SV=1 A0A286YDF5 (+2)   | 235 kDa | 18 | 1 | 0 | 0 |
| 240 | Hypoxia up-regulated protein 1 OS=Mus musculus OX=10090 GN: Q9JKR6     | 111 kDa | 17 | 0 | 0 | 0 |
| 243 | Inactive tyrosine-protein kinase 7 OS=Mus musculus OX=10090 G Q8BK63   | 118 kDa | 16 | 1 | 0 | 0 |
| 245 | Dihydropolyllysine-residue acetyltransferase component of pyruv Q8BMF4 | 68 kDa  | 14 | 0 | 0 | 0 |
